# Supplementary material for: Timing of mortality during development alters the evolution of aging
Source: bioRxiv or medRxiv preprint supplement (doi:10.1101/2023.01.24.525295), 2025-07-24
Supplement: Supplementary file [file media-1.pdf]

| Parameter               | Meaning                                                             | Value(s)                    |
|-------------------------|---------------------------------------------------------------------|-----------------------------|
| a                       | Multiplier for the exponential part of the Gompertz-Makeham model   | 1.15106610e-02              |
| b                       | Exponential factor of the Gompertz-Makeham model                    | Trait (initialized at 0.07) |
| c                       | Age-independent mortality component                                 | 4.26805906e-02              |
| Lmax                    | Maximum benefit of learning                                         | Trait (initialized at 0.1)  |
| k                       | Age at which learning is equal to Lmax/2                            | 3.94526937e+01              |
| n                       | Steepness of the learning curve                                     | 9.41817943e-02              |
| Gmax                    | Maximum benefit of growth                                           | 1.00399978e-01              |
| h                       | Growth rate                                                         | 9.23916941e-02              |
| c_{f} (female)          | Brass polynomial coefficient for females                            | 2.445e-5                    |
| d(female)               | Age at which reproduction starts for females                        | 14.8                        |
| w(female)               | Span of the reproduction period for females                         | 32.836                      |
| c_{f} (male)            | Brass polynomial coefficient for males                              | 9.78e-06                    |
| d(male)                 | Age at which reproduction starts for males                          | 14.8                        |
| w(male)                 | Span of the reproduction period for males                           | 47.836                      |
| age half(male)          | Age at which fertility stagnates to half of the fertility at age 35 | 55                          |
| Initial population size | Starting population size for the sexual model                       | 5000                        |
| Population threshold    | Maximum number of agents for the sexual model                       | 10000                       |
| Population size         | Constant number of agents for the asexual model                     | 20000                       |
| Mutation rate           | Chance of a mutation appearing                                      | 0.02                        |
